# Supplementary material for: ADAM9 Expression Is Associate with Glioma Tumor Grade and Histological Type, and Acts as a Prognostic Factor in Lower-Grade Gliomas
Source: PubMed Central journal article supplement (PMC5037653; doi:10.3390/ijms17091276), 2016-08-26
Supplement: ijms-17-01276-s001.pdf [file ijms-17-01276-s001.pdf]

# Supplementary Materials: ADAM9 Expression Is Associate with Glioma Tumor Grade and Histological Type, and Acts as a Prognostic Factor in Lower-Grade Gliomas

Xing Fan, Yongheng Wang, Chuanbao Zhang, Li Liu, Sen Yang, Yinyan Wang, Xing Liu, Zenghui Qian, Shengyu Fang, Hui Qiao and Tao Jiang

**Table S1.** Comparison of the gene expression of 22 members in ADAM family between LGGs and GBMs patients.

| Gene Symbol | p-Value | Pathological Functions in Human Cancers                                                                                                                                                                                                               |
|-------------|---------|-------------------------------------------------------------------------------------------------------------------------------------------------------------------------------------------------------------------------------------------------------|
| ADAM1A      | 0.056   | Uncharacterized                                                                                                                                                                                                                                       |
| ADAM3A      | 0.408   | Uncharacterized                                                                                                                                                                                                                                       |
| ADAM5       | 0.223   | Uncharacterized                                                                                                                                                                                                                                       |
| ADAM6       | <0.001  | Uncharacterized                                                                                                                                                                                                                                       |
| ADAM7       | 0.179   | Uncharacterized                                                                                                                                                                                                                                       |
| ADAM8       | 0.002   | The protein encoded by this gene may be involved in cell adhesion during neurodegeneration (provided by RefSeq, August 2009)<br>Up-regulated in gliomas and associated with local invasion [14]                                                       |
| ADAM9       | <0.001  | As we described in the paper                                                                                                                                                                                                                          |
| ADAM10      | 0.552   | This gene encodes an ADAM family member that cleaves many proteins including TNF-alpha and E-cadherin (provided by RefSeq, February 2016)                                                                                                             |
| ADAM11      | <0.001  | Represents a candidate tumor suppressor gene for human breast cancer (provided by RefSeq, January 2016)                                                                                                                                               |
| ADAM12      | <0.001  | Up-regulated by TGF- $\beta$ in human activated hepatic stellate cells and associate with tumor aggressiveness and progression in liver cancer [32]                                                                                                   |
| ADAM15      | <0.001  | This protein may function in cell-cell adhesion as well as in cellular signaling (provided by RefSeq, July 2008)                                                                                                                                      |
| ADAM17      | 0.234   | Functions in the processing of numerous other substrates, including cell adhesion proteins, cytokine and growth factor receptors and epidermal growth factor receptor ligands (provided by RefSeq, February 2016)                                     |
| ADAM18      | 0.082   | Uncharacterized                                                                                                                                                                                                                                       |
| ADAM19      | <0.001  | An active metalloproteinase which may be involved in cell migration, cell adhesion, cell-cell and cell-matrix interactions, and signal transduction (provided by RefSeq, May 2013)<br>Up-regulated in gliomas and associated with local invasion [14] |
| ADAM20      | 0.005   | Uncharacterized                                                                                                                                                                                                                                       |
| ADAM21      | 0.019   | Uncharacterized                                                                                                                                                                                                                                       |
| ADAM22      | <0.001  | Inhibits cellular proliferation of glioma-derived astrocytes [48]                                                                                                                                                                                     |
| ADAM23      | 0.014   | It is reported that inactivation of this gene is associated with tumorigenesis in human cancers (provided by RefSeq, May 2013)                                                                                                                        |
| ADAM28      | 0.429   | Involved in cancer cell proliferation, invasion and metastasis [49]                                                                                                                                                                                   |
| ADAM30      | 0.073   | Uncharacterized                                                                                                                                                                                                                                       |
| ADAM32      | <0.001  | Uncharacterized                                                                                                                                                                                                                                       |
| ADAM33      | <0.001  | A novel regulatory mechanism in the IL-18-secreted process in gastric cancer [50]                                                                                                                                                                     |
